# Supplementary material
Source: publisher site journal article supplement (https://www.spandidos-publications.com/1545/downloadSupplementary)
Supplement: Supplementary file 2 [file downloadSupplementary]

## Sheet: Table S3
Table SIII. Differently expressed genes between the si-FAM83A and si-NS groups in HeLa cells (n=192).
Gene ID	Gene name	si-FAM83A1	si-NS1	FC1	Padj1	si-FAM83A2	si-NS2	FC2	Padj2	si-FAM83A3	si-NS3	FC3	Padj3
ENSG00000148848	ADAM12	181.712	63.6615	1.5132	6.22×10-12	190.008	61.5282	1.6267	1.69×10-14	200.797	64.477	1.6389	1.88×10-18
ENSG00000135074	ADAM19	63.7367	27.1171	1.2329	4.18×10-03	99.0692	41.9888	1.2384	4.99×10-05	143.842	44.6765	1.6869	1.04×10-13
ENSG00000154734	ADAMTS1	82.0584	33.328	1.2999	2.71×10-04	77.733	29.8139	1.3825	1.11×10-04	45.7733	18.1087	1.3378	2.43×10-03
ENSG00000163050	ADCK3	15.1037	45.8052	-1.6006	1.10×10-03	17.8186	55.2329	-1.6321	2.82×10-04	19.8001	61.344	-1.6314	5.10×10-04
ENSG00000139211	AMIGO2	86.8853	17.7454	2.2917	3.43×10-10	73.0621	15.7978	2.2094	2.08×10-08	165.098	40.4156	2.0303	1.06×10-19
ENSG00000148677	ANKRD1	45.0517	3.32726	3.7592	1.12×10-08	30.7357	2.435	3.6579	7.00×10-06	49.908	2.19309	4.5082	1.65×10-11
ENSG00000163297	ANTXR2	37.3181	3.38271	3.4636	9.48×10-07	27.3334	2.61317	3.3868	6.21×10-05	66.5052	4.69949	3.8229	3.63×10-14
ENSG00000138772	ANXA3	223.442	92.775	1.2681	4.15×10-11	173.458	78.9889	1.1349	1.22×10-07	174.3	84.4655	1.0451	9.38×10-09
ENSG00000138356	AOX1	48.8925	9.26086	2.4004	4.40×10-06	44.0564	9.38365	2.2311	3.79×10-05	64.4087	7.08056	3.1853	4.81×10-12
ENSG00000180801	ARSJ	77.7504	29.058	1.4199	1.15×10-04	83.3265	29.3387	1.506	1.06×10-05	98.2437	36.9693	1.41	1.89×10-07
ENSG00000074370	ATP2A3	75.3629	22.7363	1.7289	4.64×10-06	75.7723	21.618	1.8094	9.87×10-07	49.2092	8.39642	2.5511	1.51×10-07
ENSG00000137936	BCAR3	118.235	38.5407	1.6172	1.34×10-08	101.837	36.8219	1.4676	1.07×10-06	103.543	44.3632	1.2228	1.67×10-06
ENSG00000171552	BCL2L1	143.667	53.4025	1.4278	1.23×10-08	123.808	51.6101	1.2624	1.81×10-06	157.062	68.6125	1.1948	1.78×10-09
ENSG00000023445	BIRC3	315.517	105.03	1.5869	2.98×10-22	211.344	77.5636	1.4461	1.44×10-13	164.167	59.8402	1.456	6.05×10-13
ENSG00000104081	BMF	9.03109	34.8253	-1.9472	1.21×10-03	4.55557	28.5667	-2.6486	4.27×10-04	6.81358	54.8274	-3.0084	4.50×10-08
ENSG00000112763	BTN2A1	58.235	19.6863	1.5647	4.45×10-04	48.2659	16.6292	1.5373	1.94×10-03	63.0693	25.5026	1.3063	2.13×10-04
ENSG00000173918	C1QTNF1	105.363	30.7771	1.7754	8.80×10-09	98.6655	29.2794	1.7527	2.28×10-08	61.031	23.1215	1.4003	1.15×10-04
ENSG00000182326	C1S	197.023	52.2934	1.9137	3.26×10-18	138.685	49.472	1.4871	2.72×10-09	64.0593	27.5703	1.2163	4.57×10-04
ENSG00000204387	C6orf48	52.2142	121.833	-1.2224	1.61×10-06	56.6851	138.498	-1.2888	1.73×10-07	77.9194	167.991	-1.1083	1.82×10-05
ENSG00000162909	CAPN2	429.755	187.713	1.195	2.36×10-19	410.52	182.922	1.1662	6.57×10-19	602.973	242.807	1.3123	1.39×10-41
ENSG00000108691	CCL2	52.8371	19.1872	1.4614	2.33×10-03	49.9959	17.1044	1.5474	1.38×10-03	27.4873	5.82737	2.2378	9.06×10-04
ENSG00000196352	CD55	3179.15	580.828	2.4525	0.00×10-00	1866.46	487.89	1.9357	6.90×10-185	1043.06	442.754	1.2362	1.51×10-66
ENSG00000163814	CDCP1	650.81	172.019	1.9197	9.52×10-61	578.557	158.215	1.8706	4.86×10-54	601.866	177.327	1.763	5.73×10-61
ENSG00000140945	CDH13	72.1968	21.5717	1.7428	6.98×10-06	65.2772	21.0835	1.6305	5.13×10-05	110.415	38.9118	1.5047	4.43×10-09
ENSG00000124762	CDKN1A	198.269	84.1796	1.2359	1.88×10-09	175.995	83.0275	1.0839	3.36×10-07	150.365	29.9514	2.3278	6.39×10-21
ENSG00000117724	CENPF	218.978	501.528	-1.1955	6.63×10-26	269.182	554.407	-1.0424	2.24×10-21	284.365	602.976	-1.0844	1.34×10-18
ENSG00000123989	CHPF	150.466	45.9161	1.7124	6.91×10-12	131.131	42.9985	1.6087	7.39×10-10	100.573	34.2123	1.5557	1.21×10-08
ENSG00000033100	CHPF2	147.975	52.8479	1.4854	1.88×10-09	110.314	41.1574	1.4224	6.48×10-07	125.207	57.5217	1.1221	5.63×10-07
ENSG00000179862	CITED4	30.2074	6.87633	2.1352	2.61×10-03	32.581	6.82987	2.2541	7.10×10-04	29.8749	5.89003	2.3426	2.82×10-04
ENSG00000163347	CLDN1	191.418	46.4152	2.0441	2.40×10-19	145.778	40.1478	1.8604	1.98×10-13	171.33	51.8824	1.7235	8.72×10-17
ENSG00000108821	COL1A1	180.362	88.2278	1.0316	2.33×10-06	350.029	121.809	1.5229	2.65×10-24	358.324	76.3823	2.23	7.91×10-48
ENSG00000187498	COL4A1	584.685	244.997	1.2549	1.46×10-28	604.449	263.93	1.1955	5.05×10-29	551.026	240.802	1.1943	2.25×10-33
ENSG00000197565	COL4A6	248.199	112.184	1.1456	1.95×10-10	172.535	73.2875	1.2352	1.09×10-08	137.96	58.5243	1.2371	9.62×10-09
ENSG00000128510	CPA4	80.9684	17.2463	2.2311	3.49×10-09	42.4417	14.0161	1.5984	3.33×10-03	83.743	35.4028	1.2421	2.11×10-05
ENSG00000110090	CPT1A	54.498	198.748	-1.8667	2.37×10-19	52.2449	187.554	-1.8439	4.12×10-17	42.1627	224.26	-2.4111	1.91×10-25
ENSG00000184371	CSF1	202.473	77.5805	1.384	1.40×10-11	175.015	71.1494	1.2986	1.55×10-09	149.083	62.0332	1.265	1.02×10-09
ENSG00000147408	CSGALNACT1	115.951	48.9661	1.2437	1.28×10-05	114.062	47.9279	1.2509	7.17×10-06	96.4384	33.5857	1.5218	4.61×10-08
ENSG00000159176	CSRP1	482.333	185.883	1.3756	2.49×10-27	448.925	164.214	1.4509	4.62×10-29	413.707	133.528	1.6315	6.44×10-38
ENSG00000118523	CTGF	116.055	13.1981	3.1364	3.52×10-19	100.165	14.7882	2.7599	7.40×10-15	134.35	13.0959	3.3588	2.88×10-26
ENSG00000135047	CTSL1	371.728	117.785	1.6581	5.10×10-28	322.523	116.464	1.4695	3.16×10-21	351.103	122.688	1.5169	2.85×10-29
ENSG00000163131	CTSS	91.7123	23.2908	1.9774	6.97×10-09	48.4966	16.748	1.5339	1.92×10-03	53.6351	16.6049	1.6916	3.31×10-05
ENSG00000163739	CXCL1	575.031	83.4587	2.7845	6.82×10-85	266.703	37.4158	2.8335	6.86×10-41	289.606	77.8862	1.8947	6.94×10-32
ENSG00000081041	CXCL2	140.812	23.6235	2.5755	6.02×10-19	94.8596	18.114	2.3887	5.30×10-12	66.7381	19.0486	1.8088	5.75×10-07
ENSG00000163734	CXCL3	70.4321	15.3054	2.2022	7.36×10-08	63.0283	10.4527	2.5921	9.57×10-09	54.6833	13.9105	1.9749	2.33×10-06
ENSG00000057019	DCBLD2	205.224	43.7534	2.2297	3.23×10-23	180.839	48.9375	1.8857	5.82×10-17	318.491	85.844	1.8915	4.99×10-35
ENSG00000107201	DDX58	257.282	36.0453	2.8355	1.42×10-38	142.953	28.8042	2.3112	2.25×10-17	82.6365	27.9463	1.5641	3.51×10-07
ENSG00000137628	DDX60	218.978	94.4386	1.2133	3.93×10-10	229.047	67.8236	1.7558	1.78×10-19	75.7647	18.1087	2.0648	3.36×10-09
ENSG00000181381	DDX60L	112.058	23.5126	2.2527	7.55×10-13	80.6162	22.9246	1.8142	3.51×10-07	55.3239	15.7903	1.8089	8.21×10-06
ENSG00000107984	DKK1	54.0308	3.54907	3.9283	1.03×10-10	44.979	3.80097	3.5648	1.99×10-08	56.7216	4.63683	3.6127	1.22×10-11
ENSG00000050165	DKK3	34.8787	6.87633	2.3426	3.01×10-04	42.2111	8.67096	2.2834	4.50×10-05	42.5121	6.14066	2.7914	3.98×10-07
ENSG00000173852	DPY19L1	119.117	51.4616	1.2108	1.59×10-05	129.978	49.2344	1.4005	5.93×10-08	150.423	47.3082	1.6689	3.93×10-14
ENSG00000136048	DRAM1	138.477	30.9435	2.1619	4.66×10-15	125.249	31.2986	2.0006	1.03×10-12	66.6217	26.3171	1.34	8.54×10-05
ENSG00000120129	DUSP1	133.39	41.7016	1.6775	3.09×10-10	112.621	41.098	1.4543	2.68×10-07	78.3853	28.2596	1.4718	2.59×10-06
ENSG00000116406	EDEM3	117.508	48.7443	1.2695	7.01×10-06	128.998	53.9857	1.2567	1.08×10-06	137.32	51.4437	1.4165	2.03×10-10
ENSG00000063046	EIF4B	338.303	846.177	-1.3226	4.30×10-51	436.527	1001.2	-1.1976	1.43×10-48	376.843	870.972	-1.2087	4.64×10-33
ENSG00000143924	EML4	53.7713	132.647	-1.3027	8.33×10-08	66.6612	135.944	-1.0281	3.89×10-05	50.2574	159.971	-1.6704	1.35×10-10
ENSG00000142627	EPHA2	452.748	99.3186	2.1886	2.80×10-50	310.355	99.6567	1.6389	5.62×10-24	359.14	124.129	1.5327	2.44×10-30
ENSG00000124882	EREG	72.4564	11.0909	2.7077	2.52×10-10	43.0184	8.55218	2.3306	2.70×10-05	31.8549	7.39386	2.1071	4.60×10-04
ENSG00000151327	FAM177A1	87.5082	33.9935	1.3642	6.19×10-05	101.376	40.3259	1.3299	9.52×10-06	96.1472	36.3427	1.4036	2.99×10-07
ENSG00000140092	FBLN5	75.7262	25.6199	1.5635	2.86×10-05	117.118	36.1686	1.6952	1.75×10-09	72.5035	18.61	1.962	2.59×10-08
ENSG00000077782	FGFR1	148.65	43.7534	1.7644	2.97×10-12	154.14	51.0162	1.5952	1.88×10-11	155.664	38.4105	2.0189	1.88×10-18
ENSG00000115414	FN1	656.882	281.874	1.2206	1.08×10-30	667.131	174.845	1.9319	3.02×10-65	727.422	166.237	2.1296	1.52×10-92
ENSG00000075420	FNDC3B	404.167	154.163	1.3905	2.94×10-23	350.087	140.398	1.3182	1.64×10-19	303.466	138.29	1.1338	4.49×10-17
ENSG00000175592	FOSL1	59.1692	10.9799	2.43	1.87×10-07	58.2421	17.4013	1.7429	6.43×10-05	119.733	31.3299	1.9342	1.70×10-13
ENSG00000176678	FOXL1	41.9375	11.6454	1.8485	9.40×10-04	44.4024	13.541	1.7133	1.10×10-03	58.1193	16.8555	1.7858	5.18×10-06
ENSG00000134363	FST	51.4357	6.70997	2.9384	5.42×10-08	32.5233	6.41414	2.3421	4.76×10-04	34.825	9.58696	1.861	7.48×10-04
ENSG00000070404	FSTL3	431.468	137.471	1.6501	2.52×10-32	339.419	133.865	1.3423	1.83×10-19	381.269	126.197	1.5951	6.52×10-34
ENSG00000163820	FYCO1	91.0376	34.7144	1.3909	2.75×10-05	97.2815	37.4752	1.3762	8.28×10-06	73.377	34.7762	1.0772	5.98×10-04
ENSG00000117226	GBP3	45.7783	7.43087	2.6231	2.58×10-06	33.8496	7.42377	2.1889	6.97×10-04	37.9115	7.70716	2.2984	2.86×10-05
ENSG00000065325	GLP2R	130.743	34.2153	1.934	2.93×10-12	84.9988	22.1525	1.94	2.80×10-08	37.562	10.9655	1.7763	6.37×10-04
ENSG00000197045	GMFB	41.2108	102.202	-1.3103	4.43×10-06	44.5754	91.4609	-1.0369	1.57×10-03	45.0745	110.219	-1.29	8.59×10-05
ENSG00000112414	GPR126	145.847	42.9216	1.7647	5.02×10-12	136.609	38.0097	1.8456	1.91×10-12	111.172	30.39	1.8711	5.11×10-12
ENSG00000023171	GRAMD1B	188.615	40.4262	2.2221	3.06×10-21	171.324	35.7529	2.2606	2.83×10-20	56.3722	21.4923	1.3912	2.80×10-04
ENSG00000113070	HBEGF	34.8268	7.98542	2.1248	9.19×10-04	33.7343	8.19584	2.0413	1.50×10-03	42.8033	5.89003	2.8614	2.46×10-07
ENSG00000130589	HELZ2	365.915	27.8935	3.7135	4.17×10-70	220.686	30.8235	2.8399	7.01×10-34	92.9442	18.4847	2.33	6.17×10-13
ENSG00000138642	HERC6	97.8887	15.139	2.6929	7.51×10-14	56.5698	9.56182	2.5647	9.31×10-08	31.0396	7.58184	2.0335	8.11×10-04
ENSG00000111911	HINT3	70.3283	26.8953	1.3868	4.39×10-04	68.4488	28.923	1.2428	1.61×10-03	50.0827	21.6803	1.2079	3.41×10-03
ENSG00000090339	ICAM1	58.4426	12.9763	2.1711	2.06×10-06	69.8905	14.4318	2.2758	2.43×10-08	48.1609	11.7801	2.0315	8.21×10-06
ENSG00000137331	IER3	382.057	129.098	1.5653	1.99×10-26	346.742	110.228	1.6534	3.72×10-27	268.35	101.07	1.4088	2.82×10-20
ENSG00000165949	IFI27	349.202	4.32543	6.3351	3.25×10-79	144.625	1.1878	6.9279	4.73×10-32	21.7219	0	4.978	3.01×10-05
ENSG00000137965	IFI44	212.075	66.5451	1.6722	3.57×10-16	140.127	43.3548	1.6925	2.49×10-11	82.52	29.9514	1.4621	1.40×10-06
ENSG00000137959	IFI44L	190.795	21.6272	3.1411	1.26×10-31	108.642	17.8764	2.6034	3.85×10-15	48.5104	16.6675	1.5413	3.25×10-04
ENSG00000126709	IFI6	1499.52	41.868	5.1625	0.00×10-00	654.675	23.1028	4.8246	8.70×10-148	77.1041	9.71228	2.9889	1.07×10-13
ENSG00000163453	IGFBP7	44.0136	12.4218	1.8251	7.31×10-04	47.401	12.2344	1.954	1.11×10-04	36.0479	8.77238	2.0389	2.06×10-04
ENSG00000095752	IL11	41.2108	3.93725	3.3878	2.61×10-07	59.972	6.47353	3.2117	2.56×10-10	51.4221	4.76215	3.4327	3.54×10-10
ENSG00000125538	IL1B	34.3597	3.99271	3.1053	1.15×10-05	30.332	2.49439	3.6041	9.51×10-06	12.8119	0	4.8684	3.71×10-03
ENSG00000077238	IL4R	57.8198	16.6363	1.7972	6.08×10-05	59.3954	17.7577	1.7419	5.17×10-05	47.7533	10.6522	2.1645	3.50×10-06
ENSG00000136244	IL6	313.649	16.2481	4.2708	1.02×10-65	189.662	10.0369	4.24	5.27×10-40	48.6268	10.7775	2.1737	2.59×10-06
ENSG00000168685	IL7R	412.16	82.7932	2.3156	4.02×10-49	303.551	78.395	1.9531	6.11×10-30	265.613	125.508	1.0816	5.40×10-14
ENSG00000169429	IL8	1513.02	27.3944	5.7874	0.00×10-00	1153.65	19.7769	5.8662	4.04×10-269	838.944	16.6675	5.6535	1.07×10-205
ENSG00000134070	IRAK2	56.626	20.1854	1.4882	1.10×10-03	50.2266	17.045	1.5591	1.21×10-03	54.7416	19.4246	1.4948	1.46×10-04
ENSG00000187608	ISG15	1951.6	350.138	2.4787	3.40×10-255	1077.31	218.675	2.3006	1.64×10-132	309.29	125.946	1.2962	6.53×10-21
ENSG00000213949	ITGA1	100.951	43.0325	1.2302	8.12×10-05	80.9046	29.6357	1.4489	3.18×10-05	46.7051	17.4194	1.4229	1.11×10-03
ENSG00000164171	ITGA2	286.4	50.907	2.4921	3.31×10-37	215.899	42.4046	2.3481	8.23×10-27	180.764	44.3632	2.0267	1.58×10-21
ENSG00000005884	ITGA3	510.88	220.985	1.209	1.85×10-23	510.051	216.774	1.2344	1.00×10-25	573.273	224.636	1.3516	3.90×10-41
ENSG00000161638	ITGA5	725.654	344.427	1.0751	2.11×10-27	956.611	330.031	1.5353	8.35×10-68	1044.63	244.248	2.0966	7.14×10-131
ENSG00000132470	ITGB4	310.587	114.347	1.4416	6.47×10-19	233.891	100.666	1.2163	1.63×10-11	202.777	70.743	1.5192	6.49×10-17
ENSG00000082781	ITGB5	270.31	106.528	1.3434	9.89×10-15	253.555	94.0146	1.4313	4.97×10-16	270.563	106.146	1.3499	2.64×10-19
ENSG00000148841	ITPRIP	196.608	60.1679	1.7083	1.84×10-15	164.289	58.6181	1.4868	5.23×10-11	114.491	50.0026	1.1952	5.86×10-07
ENSG00000101384	JAG1	81.1241	15.8599	2.3547	7.78×10-10	81.0199	19.183	2.0784	1.24×10-08	133.767	27.5703	2.2785	3.47×10-18
ENSG00000171223	JUNB	230.137	98.5977	1.2229	8.80×10-11	199.234	92.2923	1.1102	1.83×10-08	135.282	60.0281	1.1723	5.61×10-08
ENSG00000184185	KCNJ12	65.2938	13.3645	2.2885	1.19×10-07	47.8046	12.3532	1.9523	1.03×10-04	51.888	11.968	2.1162	1.57×10-06
ENSG00000100196	KDELR3	45.5188	14.9172	1.6095	2.36×10-03	49.5923	17.1044	1.5357	1.61×10-03	44.4921	11.2788	1.9799	3.15×10-05
ENSG00000183853	KIRREL	314.894	132.425	1.2497	2.89×10-15	323.676	133.034	1.2828	2.67×10-17	450.046	202.266	1.1538	5.53×10-26
ENSG00000128422	KRT17	752.539	89.2259	3.0762	2.99×10-123	436.181	90.8076	2.264	4.63×10-52	188.975	40.2903	2.2297	4.20×10-25
ENSG00000101680	LAMA1	113.875	36.988	1.6223	2.56×10-08	126.287	49.0563	1.3642	1.99×10-07	103.135	51.1931	1.0105	4.96×10-05
ENSG00000112769	LAMA4	346.763	95.7141	1.8571	8.88×10-31	339.13	115.93	1.5486	3.91×10-24	420.52	159.344	1.4	1.47×10-31
ENSG00000091136	LAMB1	626.727	240.062	1.3844	6.40×10-36	654.791	278.065	1.2356	3.56×10-33	717.289	290.679	1.3031	4.61×10-49
ENSG00000196878	LAMB3	280.898	116.01	1.2758	4.37×10-14	205.75	86.1751	1.2556	1.19×10-10	109.483	45.9923	1.2512	4.43×10-07
ENSG00000135862	LAMC1	988.074	279.878	1.8198	1.10×10-85	986.713	297.129	1.7315	2.66×10-83	1065.07	284.037	1.9068	1.58×10-119
ENSG00000130164	LDLR	133.183	39.7053	1.746	7.94×10-11	120.809	32.0707	1.9134	1.45×10-11	98.4184	33.0844	1.5728	1.40×10-08
ENSG00000090530	LEPREL1	131.107	45.3616	1.5312	8.81×10-09	127.383	42.5827	1.5808	2.47×10-09	136.213	54.702	1.3162	2.26×10-09
ENSG00000128342	LIF	195.933	54.0125	1.859	2.17×10-17	170.92	44.9584	1.9267	1.66×10-16	136.97	38.5358	1.8296	1.99×10-14
ENSG00000238266	LINC00707	62.6467	19.0763	1.7155	5.25×10-05	54.7245	19.0049	1.5258	7.72×10-04	60.1575	17.8581	1.7522	4.49×10-06
ENSG00000144749	LRIG1	56.0032	16.4145	1.7705	1.10×10-04	60.491	17.2231	1.8124	2.17×10-05	79.4918	22.1189	1.8455	1.82×10-08
ENSG00000197324	LRP10	234.86	96.6568	1.2809	7.30×10-12	186.432	92.3517	1.0134	7.78×10-07	158.867	71.6202	1.1494	4.25×10-09
ENSG00000175130	MARCKSL1	20.5016	78.5787	-1.9384	4.74×10-08	31.1393	90.3918	-1.5375	2.17×10-06	28.5937	101.885	-1.8332	7.62×10-08
ENSG00000135272	MDFIC	64.3076	25.1208	1.3561	1.27×10-03	64.7583	22.4495	1.5284	1.55×10-04	58.3522	27.0691	1.1081	2.68×10-03
ENSG00000161091	MFSD12	377.23	103.034	1.8723	6.81×10-34	223.338	73.1093	1.6111	8.13×10-17	142.037	70.9936	1.0005	9.44×10-07
ENSG00000091436	MLTK	59.844	135.087	-1.1746	8.31×10-07	79.4053	162.491	-1.0331	3.52×10-06	58.7016	146.499	-1.3194	1.51×10-06
ENSG00000157601	MX1	316.607	7.87451	5.3294	8.72×10-72	128.479	4.2167	4.9293	8.63×10-29	27.1961	2.81969	3.2698	2.85×10-05
ENSG00000144959	NCEH1	90.6742	32.7735	1.4682	1.01×10-05	95.0326	30.1702	1.6553	1.93×10-07	139.358	38.0972	1.871	4.35×10-15
ENSG00000077150	NFKB2	341.728	128.432	1.4118	3.90×10-20	300.84	124.898	1.2683	8.60×10-16	197.536	79.4527	1.3139	1.35×10-13
ENSG00000116962	NID1	81.1241	31.3317	1.3725	1.27×10-04	103.048	33.4367	1.6238	7.58×10-08	85.1989	19.4872	2.1283	1.05×10-10
ENSG00000165802	NSMF	69.0827	181.225	-1.3914	9.65×10-12	77.906	193.79	-1.3147	8.13×10-11	72.4452	191.426	-1.4018	1.91×10-09
ENSG00000135318	NT5E	306.59	30.2226	3.3426	6.39×10-54	231.642	29.5169	2.9723	3.07×10-37	225.139	51.2558	2.135	1.66×10-28
ENSG00000074527	NTN4	62.5429	15.9154	1.9744	4.64×10-06	52.3602	16.9856	1.6242	5.11×10-04	72.62	20.4271	1.8299	1.14×10-07
ENSG00000089127	OAS1	214.67	16.4145	3.7091	5.41×10-41	103.682	11.2247	3.2074	8.29×10-18	36.572	5.26343	2.7967	3.60×10-06
ENSG00000111331	OAS3	488.769	72.2569	2.7579	2.20×10-71	241.618	52.3227	2.2072	7.40×10-28	82.3453	34.9015	1.2384	2.69×10-05
ENSG00000135114	OASL	190.38	47.4134	2.0055	9.32×10-19	134.072	34.9808	1.9384	4.65×10-13	47.9862	19.0486	1.3329	1.78×10-03
ENSG00000173391	OLR1	353.043	59.2806	2.5742	1.00×10-47	168.268	39.4351	2.0932	4.16×10-18	47.3456	16.7928	1.4954	5.73×10-04
ENSG00000145623	OSMR	532.16	192.038	1.4705	1.72×10-33	504.861	163.382	1.6276	9.24×10-39	452.957	180.836	1.3247	1.44×10-31
ENSG00000081087	OSTM1	62.8024	20.019	1.6495	9.76×10-05	53.1098	18.7673	1.5008	1.21×10-03	57.7116	22.1816	1.3795	2.48×10-04
ENSG00000072682	P4HA2	104.584	43.5871	1.2627	3.34×10-05	102.702	46.6807	1.1376	1.46×10-04	101.738	36.1547	1.4926	2.72×10-08
ENSG00000182752	PAPPA	175.483	80.2978	1.1279	3.42×10-07	134.937	58.2618	1.2117	1.31×10-06	141.688	42.734	1.7293	6.39×10-14
ENSG00000198682	PAPSS2	47.7506	17.4126	1.4554	4.91×10-03	52.5909	14.9069	1.8188	1.03×10-04	68.0193	16.1662	2.073	2.58×10-08
ENSG00000173193	PARP14	180.778	33.1617	2.4466	6.42×10-23	97.9159	29.5763	1.7271	3.87×10-08	61.264	21.3043	1.5239	3.32×10-05
ENSG00000150593	PDCD4	37.7853	130.706	-1.7904	4.84×10-12	39.0395	137.132	-1.8126	3.21×10-12	28.7684	102.699	-1.8359	6.35×10-08
ENSG00000100311	PDGFB	43.3389	5.26816	3.0403	5.64×10-07	35.5219	4.57304	2.9575	1.13×10-05	42.6286	2.00511	4.4101	9.60×10-10
ENSG00000196923	PDLIM7	334.721	125.382	1.4166	7.79×10-20	263.935	126.145	1.0651	1.69×10-10	296.769	127.575	1.218	1.95×10-18
ENSG00000139289	PHLDA1	104.221	30.278	1.7833	9.61×10-09	122.078	35.6341	1.7765	1.45×10-10	112.22	50.6292	1.1483	1.82×10-06
ENSG00000181649	PHLDA2	87.9234	34.4371	1.3523	6.87×10-05	88.2281	28.2697	1.642	7.78×10-07	93.2936	34.5256	1.4341	3.07×10-07
ENSG00000073921	PICALM	276.486	129.375	1.0957	8.80×10-11	288.154	123.413	1.2233	2.69×10-14	249.424	121.56	1.0369	2.19×10-12
ENSG00000011422	PLAUR	172.836	67.266	1.3615	1.25×10-09	143.933	58.143	1.3077	6.28×10-08	111.754	47.3082	1.2402	3.86×10-07
ENSG00000076356	PLXNA2	55.5879	14.8617	1.9032	3.79×10-05	39.5008	8.49279	2.2176	1.37×10-04	46.0645	8.45908	2.4451	8.82×10-07
ENSG00000117569	PTBP2	87.9234	28.7253	1.6139	2.20×10-06	96.9932	32.6052	1.5728	4.67×10-07	113.327	36.4054	1.6383	2.19×10-10
ENSG00000073756	PTGS2	675.879	206.734	1.709	1.71×10-53	693.542	150.554	2.2037	1.58×10-80	234.806	65.6675	1.8382	6.42×10-25
ENSG00000173482	PTPRM	112.992	55.8979	1.0154	6.44×10-04	112.448	55.9455	1.0072	4.20×10-04	81.5883	40.1023	1.0247	4.37×10-04
ENSG00000130202	PVRL2	170.241	57.7834	1.5589	1.05×10-11	134.13	55.5892	1.2708	4.55×10-07	92.0124	42.7967	1.1043	4.47×10-05
ENSG00000162521	RBBP4	76.3491	160.207	-1.0693	5.48×10-07	75.2534	155.84	-1.0502	4.36×10-06	69.9411	173.066	-1.3071	1.40×10-07
ENSG00000248323	RP11-213H15.3	93.5289	43.9752	1.0887	1.15×10-03	84.3645	31.0611	1.4415	2.10×10-05	44.0262	10.7775	2.0303	2.55×10-05
ENSG00000260260	RP11-304L19.5	41.2628	104.199	-1.3364	2.22×10-06	51.4952	107.14	-1.057	2.98×10-04	32.5538	80.7059	-1.3098	1.20×10-03
ENSG00000225339	RP11-513I15.6	25.8995	113.57	-2.1326	4.24×10-13	43.768	122.106	-1.4802	3.81×10-08	33.5438	100.444	-1.5823	3.71×10-06
ENSG00000197747	S100A10	261.435	128.21	1.0279	3.81×10-09	251.364	122.403	1.0381	1.41×10-09	383.366	177.703	1.1093	6.07×10-21
ENSG00000205413	SAMD9	165.362	23.679	2.804	2.02×10-24	88.3434	19.0049	2.2168	3.21×10-10	93.6431	27.0064	1.7939	1.31×10-09
ENSG00000177409	SAMD9L	64.2557	2.5509	4.6547	6.18×10-14	27.2757	2.07866	3.7139	2.78×10-05	25.682	2.00511	3.679	2.09×10-05
ENSG00000101347	SAMHD1	204.964	42.9216	2.2556	1.59×10-23	145.836	40.029	1.8652	1.77×10-13	96.4384	43.11	1.1616	1.12×10-05
ENSG00000168077	SCARA3	271.192	107.304	1.3376	1.12×10-14	203.674	74.6534	1.448	4.10×10-13	125.906	54.702	1.2027	1.07×10-07
ENSG00000124145	SDC4	617.851	132.314	2.2233	4.17×10-70	419.516	126.145	1.7336	3.21×10-35	468.972	135.721	1.7889	2.40×10-48
ENSG00000075213	SEMA3A	98.304	46.637	1.0758	9.07×10-04	85.1718	41.5731	1.0347	2.84×10-03	97.5448	43.9872	1.149	1.18×10-05
ENSG00000185033	SEMA4B	185.137	87.3959	1.083	4.35×10-07	202.521	86.5315	1.2268	4.18×10-10	159.391	44.2378	1.8492	5.13×10-17
ENSG00000106366	SERPINE1	156.902	35.7126	2.1354	8.52×10-17	223.223	38.8412	2.5228	3.77×10-30	366.827	38.8491	3.2391	3.88×10-70
ENSG00000135919	SERPINE2	649.201	208.009	1.642	1.94×10-48	502.323	191.533	1.391	1.61×10-30	889.725	397.89	1.161	4.89×10-52
ENSG00000108932	SLC16A6	95.1898	14.7508	2.69	1.87×10-13	84.0762	13.7785	2.6093	9.17×10-12	48.5104	10.8402	2.1619	2.90×10-06
ENSG00000119899	SLC17A5	52.889	17.6899	1.58	9.14×10-04	53.0522	16.9262	1.6482	3.75×10-04	65.0493	15.2263	2.095	4.71×10-08
ENSG00000106688	SLC1A1	141.487	38.6516	1.8721	1.10×10-12	109.795	27.7352	1.985	4.89×10-11	160.265	28.8235	2.4751	8.68×10-24
ENSG00000169100	SLC25A6	172.785	439.087	-1.3455	4.33×10-27	205.808	461.818	-1.166	2.42×10-21	159.158	432.228	-1.4413	2.03×10-22
ENSG00000151012	SLC7A11	343.337	160.041	1.1012	1.72×10-13	365.829	181.199	1.0136	2.08×10-13	470.312	207.905	1.1777	6.04×10-28
ENSG00000174640	SLCO2A1	78.1138	14.4736	2.4322	7.59×10-10	56.3968	11.8186	2.2545	1.14×10-06	58.8763	8.52174	2.7885	8.58×10-10
ENSG00000166750	SLFN5	237.507	84.4014	1.4926	2.89×10-15	175.418	64.4977	1.4435	3.04×10-11	95.1572	45.8043	1.0548	6.18×10-05
ENSG00000176170	SPHK1	134.999	52.7925	1.3545	1.82×10-07	139.262	58.2024	1.2587	3.13×10-07	171.097	60.8427	1.4917	6.39×10-14
ENSG00000139874	SSTR1	123.736	53.5688	1.2078	1.03×10-05	113.37	40.7417	1.4765	1.64×10-07	135.398	36.656	1.8851	8.67×10-15
ENSG00000008513	ST3GAL1	274.41	83.126	1.723	7.42×10-22	200.733	75.96	1.402	2.69×10-12	163.584	71.1816	1.2005	6.27×10-10
ENSG00000168394	TAP1	215.345	51.1843	2.0729	3.63×10-22	123	47.2152	1.3813	2.23×10-07	73.8429	33.899	1.1232	3.38×10-04
ENSG00000163513	TGFBR2	143.719	34.0489	2.0776	7.69×10-15	124.211	33.4367	1.8933	1.01×10-11	232.477	51.1304	2.1848	3.30×10-30
ENSG00000198959	TGM2	376.555	135.253	1.4772	8.18×10-24	437.507	141.289	1.6307	1.16×10-33	265.38	121.873	1.1227	1.00×10-14
ENSG00000187720	THSD4	187.577	57.1734	1.7141	7.82×10-15	161.809	43.236	1.904	2.28×10-15	142.736	45.5537	1.6477	3.32×10-13
ENSG00000142910	TINAGL1	226.504	79.466	1.5111	7.75×10-15	149.815	66.2794	1.1765	5.43×10-07	127.012	49.3133	1.3649	3.51×10-09
ENSG00000169908	TM4SF1	702.609	170.189	2.0456	1.69×10-71	511.261	167.124	1.6131	9.24×10-39	353.141	151.762	1.2184	6.39×10-22
ENSG00000198792	TMEM184B	127.837	57.1179	1.1623	1.54×10-05	104.836	50.0065	1.0679	3.27×10-04	109.425	54.702	1.0003	3.01×10-05
ENSG00000135048	TMEM2	172.681	55.8979	1.6272	1.19×10-12	168.441	54.8171	1.6195	8.80×10-13	192.236	51.6317	1.8966	3.62×10-21
ENSG00000139324	TMTC3	101.314	47.1361	1.1039	4.72×10-04	99.1845	41.8701	1.2442	4.54×10-05	122.062	55.454	1.1383	6.15×10-07
ENSG00000041982	TNC	142.733	54.6779	1.3843	3.58×10-08	174.438	54.5796	1.6763	6.70×10-14	240.688	62.4719	1.9459	2.32×10-27
ENSG00000118503	TNFAIP3	175.795	64.0497	1.4566	6.81×10-11	139.954	52.1446	1.4244	8.82×10-09	111.23	40.4783	1.4583	8.82×10-09
ENSG00000006327	TNFRSF12A	306.279	75.7505	2.0155	2.01×10-30	248.884	71.5058	1.7993	6.54×10-22	376.61	115.921	1.6999	2.33×10-36
ENSG00000146072	TNFRSF21	229.047	67.8206	1.7558	9.38×10-19	190.123	63.6663	1.5783	6.76×10-14	194.973	66.4194	1.5536	9.54×10-17
ENSG00000146242	TPBG	117.819	49.2434	1.2586	8.06×10-06	90.9383	39.6726	1.1967	2.20×10-04	117.229	50.0652	1.2274	2.22×10-07
ENSG00000186854	TRABD2A	82.3698	32.0526	1.3617	1.24×10-04	84.8835	32.0113	1.4069	3.06×10-05	64.0593	30.0141	1.0938	1.53×10-03
ENSG00000198431	TXNRD1	385.171	789.281	-1.035	1.12×10-32	329.5	785.138	-1.2527	7.73×10-41	290.247	897.728	-1.629	1.49×10-57
ENSG00000130477	UNC13A	46.3492	3.65998	3.6626	9.35×10-09	43.4797	2.49439	4.1236	5.53×10-09	47.0545	5.57673	3.0768	1.45×10-08
ENSG00000125753	VASP	197.49	95.0486	1.055	3.17×10-07	219.475	107.674	1.0274	3.22×10-08	250.763	117.425	1.0946	1.91×10-13
ENSG00000085449	WDFY1	98.2002	46.9143	1.0657	1.04×10-03	115.388	51.4319	1.1658	2.57×10-05	95.7395	40.9169	1.2264	4.61×10-06
The numbers in the si-FAM83A and si-NS columns represent three independent repeats. FAM83A, family with sequence similarity
83 member A; si, small interfering RNA; NS, scrambled control; Padj, adjusted P-value; FC, fold-change.
